# Supplementary material for: High expression of eIF4E is associated with tumor macrophage infiltration and leads to poor prognosis in breast cancer
Source: BMC Cancer. 2021 Dec 7;21:1305. doi: 10.1186/s12885-021-09010-0 (PMC8650334; doi:10.1186/s12885-021-09010-0)
Supplement: Supplementary file 8 — Additional file 8: Table S5. eIF4E co-expression of PPI network in breast. [file 12885_2021_9010_MOESM8_ESM.xlsx]

## Sheet: Sheet1
Id	Label	Degree	Betweenness	Expression
8452	CUL3	554	2.25718e+06	0
3320	HSP90AA1	449	2.33168e+06	0
7534	YWHAZ	439	1.72254e+06	0
84557	MAP1LC3A	364	1.5333e+06	0
4193	MDM2	323	1.14272e+06	0
55832	CAND1	247	438406	0
3312	HSPA8	239	943329	0
7428	VHL	239	920449	0
8453	CUL2	235	495126	0
7532	YWHAG	234	864258	0
3725	JUN	176	743914	0
5300	PIN1	176	722171	0
2932	GSK3B	171	784417	0
7529	YWHAB	164	435397	0
10014	HDAC5	163	354222	0
7013	TERF1	161	522111	0
54165	DCUN1D1	156	343085	0
5371	PML	155	562041	0
4609	MYC	139	801184	0
23435	TARDBP	136	161270	0
23468	CBX5	132	434948	0
324	APC	128	421734	0
1956	EGFR	124	684724	0
11140	CDC37	124	436217	0
5885	RAD21	123	285214	0
23512	SUZ12	114	255497	0
5594	MAPK1	112	369806	0
83878	USHBP1	111	375933	0
4791	NFKB2	109	169099	0
11007	CCDC85B	107	389791	0
5515	PPP2CA	104	340805	0
23291	FBXW11	102	313228	0
7157	TP53	97	431306	0
6203	RPS9	96	158685	0
2335	FN1	94	378136	0
2099	ESR1	94	361487	0
9146	HGS	94	334555	0
5501	PPP1CC	93	390786	0
7334	UBE2N	91	307791	0
1894	ECT2	91	249487	0
83987	CCDC8	90	258062	0
351	APP	88	502393	0
1213	CLTC	88	305062	0
7874	USP7	87	253771	0
1994	ELAVL1	85	498961	0
1173	AP2M1	83	213886	0
54507	ADAMTSL4	82	333048	0
29979	UBQLN1	77	337705	0
5781	PTPN11	77	228701	0
3190	HNRNPK	77	178610	0
4000	LMNA	74	186740	0
6135	RPL11	74	109364	0
4086	SMAD1	73	198117	0
890	CCNA2	73	112774	0
23612	PHLDA3	72	219502	0
84445	LZTS2	72	185130	0
5591	PRKDC	72	166504	0
1654	DDX3X	71	98200.6	0
8764	TNFRSF14	70	221915	0
6137	RPL13	70	125896	0
5971	RELB	69	140727	0
7316	UBC	68	375775	0
7323	UBE2D3	66	187022	0
10726	NUDC	66	178295	0
7205	TRIP6	64	186511	0
3846	KRTAP5-9	63	186033	0
51548	SIRT6	62	92280.5	0
7412	VCAM1	61	117120	0
7520	XRCC5	61	108002	0
6217	RPS16	61	93312.6	0
6176	RPLP1	60	166592	0
3313	HSPA9	60	132076	0
5747	PTK2	60	131575	0
9441	MED26	60	119526	0
672	BRCA1	59	271285	0
26270	FBXO6	59	227982	0
4343	MOV10	59	214050	0
9817	KEAP1	59	158439	0
382	ARF6	59	129762	0
331	XIAP	58	144429	0
23363	OBSL1	58	62595.7	0
2885	GRB2	57	237410	0
6223	RPS19	57	87503.6	0
9188	DDX21	57	80873.8	0
10987	COPS5	56	175141	0
10482	NXF1	56	170429	0
51343	FZR1	56	134230	0
10576	CCT2	56	95075.9	0
3185	HNRNPF	56	76064.9	0
523	ATP6V1A	54	213676	0
4591	TRIM37	54	148958	0
79016	DDA1	54	122737	0
51547	SIRT7	54	78218.7	0
3329	HSPD1	53	148819	0
27229	TUBGCP4	53	137852	0
51564	HDAC7	53	120619	0
10048	RANBP9	53	101833	0
11345	GABARAPL2	53	100112	0
6657	SOX2	52	148127	0
9531	BAG3	51	185828	0
25898	RCHY1	51	162485	0
55183	RIF1	51	147308	0
23770	FKBP8	51	102862	0
8202	NCOA3	51	83731.3	0
10868	USP20	50	138473	0
1912	PHC2	50	128494	0
6418	SET	50	106034	0
6788	STK3	50	104210	0
10188	TNK2	49	117632	0
83737	ITCH	49	101316	0
29110	TBK1	49	85281.3	0
4793	NFKBIB	49	82638.8	0
9820	CUL7	49	68493.5	0
3676	ITGA4	49	53500.8	0
3801	KIFC3	48	91172.4	0
3837	KPNB1	48	63940.4	0
6181	RPLP2	48	60731.5	0
51138	COPS4	47	116099	0
5707	PSMD1	47	100465	0
8312	AXIN1	47	92197.9	0
1147	CHUK	47	59486.6	0
6141	RPL18	47	24570.4	0
7337	UBE3A	46	121021	0
2185	PTK2B	46	112933	0
81628	TSC22D4	46	110303	0
84062	DTNBP1	45	140840	0
2275	FHL3	44	135820	0
1017	CDK2	44	91311.9	0
1977	EIF4E	44	85819.6	0
5071	PARK2	44	84048.7	0
293	SLC25A6	44	79821.8	0
5469	MED1	44	79158.2	0
4091	SMAD6	43	101062	0
821	CANX	43	95591.2	0
7416	VDAC1	43	56241.2	0
367	AR	42	169337	0
2771	GNAI2	42	145446	0
10015	PDCD6IP	42	117588	0
11059	WWP1	42	71629.4	0
9782	MATR3	42	43178.4	0
4255	MGMT	42	39002.8	0
10513	APPBP2	41	158978	0
4905	NSF	41	130631	0
55660	PRPF40A	41	96383.2	0
10808	HSPH1	41	79514.4	0
3106	HLA-B	41	60806.8	0
55957	LIN37	41	59195.2	0
6688	SPI1	41	51645.3	0
55284	UBE2W	40	105329	0
53615	MBD3	40	98183	0
30008	EFEMP2	40	94518.4	0
23197	FAF2	40	93897.5	0
11156	PTP4A3	40	91841.5	0
805	CALM2	40	86259.8	0
3093	UBE2K	40	72825	0
5717	PSMD11	40	55839.4	0
10318	TNIP1	39	107498	0
1080	CFTR	39	88913.8	0
801	CALM1	39	78162	0
808	CALM3	39	78162	0
8454	CUL1	39	57142.8	0
6142	RPL18A	39	35066.3	0
154	ADRB2	38	96401.2	0
1660	DHX9	38	53814.9	0
6624	FSCN1	38	52374.1	0
10128	LRPPRC	38	45876.3	0
9051	PSTPIP1	38	36920.7	0
2926	GRSF1	37	90638.6	0
488	ATP2A2	37	81426	0
348	APOE	37	78889.4	0
10174	SORBS3	37	69935.6	0
2549	GAB1	37	65686.9	0
7297	TYK2	37	55978.5	0
2934	GSN	37	55530.7	0
64170	CARD9	37	55214.2	0
10213	PSMD14	37	48188	0
84617	TUBB6	37	33586	0
79666	PLEKHF2	36	131206	0
54971	BANP	36	105728	0
7454	WAS	36	64048.6	0
5903	RANBP2	36	53395.8	0
7514	XPO1	36	50792.4	0
9530	BAG4	36	46464.4	0
132660	LIN54	36	46233.3	0
8717	TRADD	36	30275.2	0
5573	PRKAR1A	35	92425.6	0
6119	RPA3	35	69245.4	0
9961	MVP	34	94786.2	0
9908	G3BP2	34	82856.3	0
984	CDK11B	34	73285.3	0
3726	JUNB	34	64324.1	0
85389	SNORD14C	34	59418.9	0
85390	SNORD14D	34	59418.9	0
3178	HNRNPA1	34	54367.9	0
51676	ASB2	34	42730.9	0
23710	GABARAPL1	34	38384	0
6919	TCEA2	33	90213.8	0
4085	MAD2L1	33	89298	0
10197	PSME3	33	75983.6	0
57520	HECW2	33	71571.6	0
60	ACTB	32	51848.4	0
120892	LRRK2	32	48392.4	0
8239	USP9X	32	48131.3	0
29924	EPN1	32	47992	0
121441	NEDD1	32	42495.6	0
3308	HSPA4	31	123966	0
5868	RAB5A	31	78329.7	0
10980	COPS6	31	66476.1	0
4088	SMAD3	31	62734	0
23564	DDAH2	31	56913	0
11244	ZHX1	31	56277.6	0
3836	KPNA1	31	56054.2	0
3799	KIF5B	31	50985.3	0
1452	CSNK1A1	31	47654.6	0
409	ARRB2	31	42115.4	0
6158	RPL28	31	40842.6	0
9564	BCAR1	31	39647.2	0
10499	NCOA2	31	34556.9	0
55210	ATAD3A	31	30298.8	0
8467	SMARCA5	31	23232.9	0
10755	GIPC1	30	73424.9	0
10392	NOD1	30	62669.6	0
7528	YY1	30	59585.7	0
8751	ADAM15	30	58935.3	0
1856	DVL2	30	58421.2	0
997	CDC34	30	57707.7	0
4851	NOTCH1	30	55348.6	0
1665	DHX15	30	49877.1	0
6045	RNF2	30	32133.9	0
9282	MED14	30	26994.4	0
4163	MCC	30	26618.3	0
4090	SMAD5	30	25010	0
10728	PTGES3	30	21231.7	0
10567	RABAC1	29	87764.5	0
80700	UBXN6	29	55017.5	0
8266	UBL4A	29	48085.9	0
4686	NCBP1	29	41676	0
1915	EEF1A1	28	102376	0
4869	NPM1	28	89909.6	0
29844	TFPT	28	62778.9	0
30011	SH3KBP1	28	55131.9	0
2101	ESRRA	28	53449.3	0
2242	FES	28	46659.8	0
3014	H2AFX	28	44327.1	0
11052	CPSF6	28	44038.8	0
8945	BTRC	27	80860.3	0
6774	STAT3	27	62970.2	0
3845	KRAS	27	62220	0
7376	NR1H2	27	61527.7	0
1026	CDKN1A	27	60490.3	0
51295	ECSIT	27	59772.6	0
5521	PPP2R2B	27	56099.3	0
10971	YWHAQ	27	52824.9	0
7531	YWHAE	27	50389.9	0
4214	MAP3K1	27	48044.2	0
572	BAD	27	44111.3	0
6015	RING1	27	43972.7	0
10193	RNF41	27	39451.7	0
9260	PDLIM7	27	39399.2	0
6596	HLTF	27	36610.3	0
1855	DVL1	27	32888.4	0
25873	RPL36	27	30781.4	0
5718	PSMD12	27	12082.5	0
51105	PHF20L1	27	8138.76	0
1315	COPB1	26	91320.3	0
3881	KRT31	26	82842	0
7791	ZYX	26	55249.8	0
1445	CSK	26	53022	0
9978	RBX1	26	48048.6	0
3396	ICT1	26	45437.3	0
6670	SP3	26	41676.5	0
81631	MAP1LC3B	26	40717.8	0
9774	BCLAF1	26	37024.7	0
22933	SIRT2	26	36995.2	0
7041	TGFB1I1	26	36726.9	0
7846	TUBA1A	25	96069.2	0
274	BIN1	25	77295.6	0
1121	CHM	25	64318.5	0
10856	RUVBL2	25	63308.6	0
6722	SRF	25	62991.1	0
5585	PKN1	25	58564.9	0
23309	SIN3B	25	57437.1	0
2810	SFN	25	51907.8	0
2896	GRN	25	47236.9	0
9821	RB1CC1	25	45507.2	0
1385	CREB1	25	44752.8	0
988	CDC5L	25	44672	0
7189	TRAF6	25	44221	0
5195	PEX14	25	38833.3	0
7336	UBE2V2	25	37482.6	0
7533	YWHAH	25	36901.9	0
3326	HSP90AB1	25	36833.8	0
6118	RPA2	25	30050.6	0
10236	HNRNPR	25	17097.9	0
7431	VIM	24	95204.7	0
7415	VCP	24	75147.4	0
10640	EXOC5	24	66031.5	0
27040	LAT	24	64340.5	0
54935	DUSP23	24	45008	0
11186	RASSF1	24	44949.2	0
1499	CTNNB1	24	40535.1	0
6829	SUPT5H	24	38387.8	0
2869	GRK5	24	31396.9	0
22824	HSPA4L	24	28510.6	0
4738	NEDD8	24	24661.5	0
79005	SCNM1	24	24416.4	0
51366	UBR5	24	23970.7	0
5598	MAPK7	24	23900.8	0
975	CD81	24	23400.9	0
5481	PPID	24	22702.6	0
4223	MEOX2	23	70332.4	0
6790	AURKA	23	69658.8	0
4188	MDFI	23	58811.3	0
9322	TRIP10	23	51533.5	0
8697	CDC23	23	43876.7	0
65265	C8orf33	23	38056	0
581	BAX	23	33907.9	0
996	CDC27	23	33514.4	0
9793	CKAP5	23	31697.3	0
8666	EIF3G	23	31684.5	0
55643	BTBD2	23	30825.9	0
10616	RBCK1	23	28843.6	0
7328	UBE2H	23	28681.9	0
80306	MED28	23	28561.2	0
7150	TOP1	23	20865.4	0
55342	STRBP	23	20536.5	0
57154	SMURF1	23	20257.4	0
84708	LNX1	22	76667.9	0
25	ABL1	22	62413.1	0
6310	ATXN1	22	54953.6	0
25865	PRKD2	22	46224.4	0
1762	DMWD	22	44079.5	0
7572	ZNF24	22	40834.6	0
11030	RBPMS	22	39499.6	0
29763	PACSIN3	22	37794.3	0
9101	USP8	22	36675.3	0
79797	ZNF408	22	35710.5	0
7133	TNFRSF1B	22	28593.2	0
51608	GET4	22	26901.5	0
22938	SNW1	22	26490.5	0
11190	CEP250	22	24366.5	0
6884	TAF13	22	24303.2	0
10075	HUWE1	22	18692.2	0
8065	CUL5	22	15488.5	0
10606	PAICS	22	15140.3	0
9636	ISG15	21	54057	0
79139	DERL1	21	52020.2	0
54386	TERF2IP	21	50554.8	0
54535	CCHCR1	21	45547.5	0
8907	AP1M1	21	44097.5	0
3064	HTT	21	42203.3	0
4299	AFF1	21	41733.8	0
9318	COPS2	21	36415.6	0
5347	PLK1	21	33853.2	0
6464	SHC1	21	30388.8	0
4296	MAP3K11	21	29814.7	0
84292	WDR83	21	25858.4	0
54532	USP53	21	24880	0
10097	ACTR2	21	23932.3	0
9181	ARHGEF2	21	23760	0
6794	STK11	21	21862.7	0
79165	LENG1	21	21154.7	0
23640	HSPBP1	21	15896.4	0
2146	EZH2	21	12165.5	0
23204	ARL6IP1	20	65188.7	0
8766	RAB11A	20	60343	0
6810	STX4	20	60253.7	0
9112	MTA1	20	60171.3	0
6386	SDCBP	20	57518.2	0
79890	RIN3	20	54964.9	0
9513	FXR2	20	46747.5	0
26986	PABPC1	20	36971.1	0
3315	HSPB1	20	32622.6	0
4294	MAP3K10	20	32539.8	0
23607	CD2AP	20	29884.6	0
6625	SNRNP70	20	26134.9	0
2100	ESR2	20	21824.3	0
5970	RELA	20	21046.1	0
7153	TOP2A	20	18972.1	0
51741	WWOX	20	16203.1	0
2	A2M	19	95833.1	0
9796	PHYHIP	19	51383.8	0
94081	SFXN1	19	35436.5	0
6198	RPS6KB1	19	34361.6	0
5706	PSMC6	19	30322.8	0
6209	RPS15	19	28243.2	0
8241	RBM10	19	27778.6	0
4087	SMAD2	19	25406.4	0
51592	TRIM33	19	24826.8	0
51225	ABI3	19	24784	0
3090	HIC1	19	20332.4	0
8237	USP11	19	18662.7	0
1052	CEBPD	19	15989.5	0
84464	SLX4	19	15841.1	0
81857	MED25	19	10929.3	0
27335	EIF3K	19	10269	0
3842	TNPO1	19	9783.21	0
3383	ICAM1	19	2522.25	0
5295	PIK3R1	18	43766.6	0
10921	RNPS1	18	42708.5	0
7186	TRAF2	18	40799.2	0
85403	EAF1	18	39147.8	0
2597	GAPDH	18	38260.3	0
23327	NEDD4L	18	35909.3	0
64854	USP46	18	34963.1	0
22803	XRN2	18	34527.1	0
999	CDH1	18	33275	0
113878	DTX2	18	31486.8	0
10273	STUB1	18	29622.7	0
619571	SNORD96A	18	28733.2	0
10399	GNB2L1	18	28733.2	0
619570	SNORD95	18	28733.2	0
25777	SUN2	18	28083.8	0
10817	FRS3	18	26937.8	0
5359	PLSCR1	18	26192.8	0
29127	RACGAP1	18	26090.6	0
10920	COPS8	18	25093.9	0
79885	HDAC11	18	23820.9	0
11127	KIF3A	18	23726.1	0
79657	RPAP3	18	22095.1	0
10140	TOB1	18	21565.5	0
51194	IPO11	18	19619.1	0
8626	TP63	18	19016.2	0
5495	PPM1B	18	18756.2	0
6188	RPS3	18	18613.2	0
55737	VPS35	18	16338.9	0
10865	ARID5A	18	12979	0
10527	IPO7	18	8899.71	0
7112	TMPO	18	5627.83	0
9924	PAN2	18	3607.52	0
197131	UBR1	17	59343.4	0
604	BCL6	17	53836.5	0
10524	KAT5	17	53268.7	0
64395	GMCL1	17	47053.7	0
26173	INTS1	17	47049.7	0
10890	RAB10	17	41235.4	0
6472	SHMT2	17	39412.8	0
5894	RAF1	17	34352.3	0
5887	RAD23B	17	33275.3	0
2034	EPAS1	17	32920.2	0
89953	KLC4	17	28678	0
9667	SAFB2	17	28419.5	0
10383	TUBB4B	17	27140.5	0
675	BRCA2	17	23135.2	0
4350	MPG	17	22446	0
5431	POLR2B	17	21076.6	0
9306	SOCS6	17	20242.3	0
25788	RAD54B	17	19993.3	0
3981	LIG4	17	19824.9	0
5708	PSMD2	17	19155.4	0
23001	WDFY3	17	18910.2	0
7132	TNFRSF1A	17	16519.2	0
29966	STRN3	17	12671.7	0
4904	YBX1	17	10822.2	0
4843	NOS2	17	10626.3	0
2078	ERG	17	7052.49	0
10238	DCAF7	17	6371.83	0
2316	FLNA	16	63599.4	0
55212	BBS7	16	54691.6	0
84955	NUDCD1	16	53978.5	0
3875	KRT18	16	47860.6	0
79598	CEP97	16	34686.5	0
79174	CRELD2	16	32392.5	0
5338	PLD2	16	31636.2	0
53981	CPSF2	16	30866.4	0
142	PARP1	16	30778.5	0
857	CAV1	16	30378	0
6622	SNCA	16	28520.5	0
8379	MAD1L1	16	28238.1	0
7123	CLEC3B	16	27648.4	0
9014	TAF1B	16	25945.6	0
54778	RNF111	16	25059.9	0
54726	OTUD4	16	24954	0
2274	FHL2	16	24909.4	0
1059	CENPB	16	22527.5	0
27332	ZNF638	16	22157.5	0
25814	ATXN10	16	21447	0
4790	NFKB1	16	20369.2	0
6925	TCF4	16	20230.7	0
3984	LIMK1	16	19572.7	0
57534	MIB1	16	18868.4	0
23524	SRRM2	16	18119.3	0
10111	RAD50	16	18112.8	0
6714	SRC	16	17522	0
7283	TUBG1	16	16682.2	0
408	ARRB1	16	13846.4	0
9097	USP14	16	8540.49	0
3611	ILK	16	8537.99	0
9520	NPEPPS	16	8475.31	0
7169	TPM2	16	4950.98	0
8175	SF3A2	16	4896.85	0
9240	PNMA1	15	55516.4	0
11117	EMILIN1	15	46265.3	0
91746	YTHDC1	15	45898.9	0
7704	ZBTB16	15	39889.6	0
56893	UBQLN4	15	35967.9	0
29950	SERTAD1	15	35670.5	0
9759	HDAC4	15	34385.5	0
3661	IRF3	15	32314.4	0
10636	RGS14	15	31288.7	0
2194	FASN	15	30641.7	0
65264	UBE2Z	15	28310.8	0
125115	KRT40	15	27875	0
5618	PRLR	15	26233.7	0
64786	TBC1D15	15	25695.1	0
10592	SMC2	15	24755	0
9320	TRIP12	15	24681.3	0
55509	BATF3	15	24078.2	0
7187	TRAF3	15	23697.7	0
56257	MEPCE	15	22584	0
7128	TNFAIP3	15	22478.5	0
1869	E2F1	15	22447.7	0
3303	HSPA1A	15	19909.1	0
3304	HSPA1B	15	19909.1	0
55658	RNF126	15	18936.7	0
26994	RNF11	15	18320.3	0
2064	ERBB2	15	18304.8	0
5128	CDK17	15	17866.1	0
5468	PPARG	15	15212.6	0
55201	MAP1S	15	14877	0
58533	SNX6	15	14753.6	0
11035	RIPK3	15	14607.8	0
80128	TRIM46	15	14017.8	0
3959	LGALS3BP	15	13549.4	0
9049	AIP	15	12230.2	0
84106	PRAM1	15	11019.2	0
9013	TAF1C	15	9662.67	0
149628	PYHIN1	15	8378.13	0
311	ANXA11	15	7187.79	0
11198	SUPT16H	15	6830.45	0
56975	FAM20C	15	4869.48	0
373156	GSTK1	15	4433.3	0
1028	CDKN1C	15	3605.56	0
1947	EFNB1	14	42661.8	0
222484	LNX2	14	39641.1	0
55327	LIN7C	14	36586.2	0
23002	DAAM1	14	35050	0
3838	KPNA2	14	35046.4	0
25913	POT1	14	34965.2	0
51132	RLIM	14	34765.8	0
9099	USP2	14	33407.5	0
6915	TBXA2R	14	31276.1	0
8850	KAT2B	14	30798.4	0
51510	CHMP5	14	30685	0
213	ALB	14	29737	0
55738	ARFGAP1	14	28783.8	0
6187	RPS2	14	28428	0
26784	SNORA64	14	28428	0
57326	PBXIP1	14	28252.4	0
5578	PRKCA	14	27381.2	0
6500	SKP1	14	26887	0
9092	SART1	14	24965.5	0
23281	MTUS2	14	24515.7	0
10672	GNA13	14	23806.1	0
5597	MAPK6	14	23008.9	0
3305	HSPA1L	14	22805.3	0
1457	CSNK2A1	14	22439.3	0
283106	CSNK2A1P	14	22439.3	0
10289	EIF1B	14	22363.8	0
10084	PQBP1	14	21713	0
9646	CTR9	14	19720.2	0
1454	CSNK1E	14	19355.1	0
94274	PPP1R14A	14	19351.4	0
8451	CUL4A	14	17989	0
836	CASP3	14	17983.7	0
5914	RARA	14	17666.5	0
7392	USF2	14	17442	0
5609	MAP2K7	14	16783.6	0
11184	MAP4K1	14	16393.5	0
4683	NBN	14	15698.1	0
4792	NFKBIA	14	15697.3	0
7421	VDR	14	14491.2	0
6667	SP1	14	14355.1	0
51593	SRRT	14	13497.2	0
56916	SMARCAD1	14	12919.5	0
1982	EIF4G2	14	11675.7	0
6189	RPS3A	14	11531.9	0
8944	SNORD73A	14	11531.9	0
5516	PPP2CB	14	11516.1	0
51619	UBE2D4	14	10792.2	0
5605	MAP2K2	14	10608.9	0
51586	MED15	14	10394	0
5600	MAPK11	14	9573.52	0
10526	IPO8	14	8992.24	0
606500	SNORD68	14	8381.37	0
79176	FBXL15	14	7353.07	0
54751	FBLIM1	14	7322.42	0
54700	RRN3	14	7108.15	0
6191	RPS4X	14	6474.63	0
6996	TDG	14	5521.3	0
6780	STAU1	14	4203.39	0
400569	MED11	14	4070.79	0
10935	PRDX3	14	3241.87	0
3054	HCFC1	13	43089.9	0
53826	FXYD6	13	36998.7	0
80351	TNKS2	13	36052.2	0
7277	TUBA4A	13	35361.1	0
5562	PRKAA1	13	34664.2	0
5563	PRKAA2	13	33014.3	0
6455	SH3GL1	13	31881.5	0
164	AP1G1	13	26687	0
7280	TUBB2A	13	26590.8	0
5764	PTN	13	24975.1	0
117178	SSX2IP	13	24901.3	0
8328	GFI1B	13	24546.2	0
83637	ZMIZ2	13	24486.7	0
825	CAPN3	13	24151.9	0
5518	PPP2R1A	13	22304.4	0
7988	ZNF212	13	22108.6	0
55294	FBXW7	13	21808.3	0
1822	ATN1	13	20159.3	0
79959	CEP76	13	20128.5	0
4067	LYN	13	18981.8	0
3419	IDH3A	13	18845	0
55929	DMAP1	13	18588.1	0
11135	CDC42EP1	13	17476.2	0
51024	FIS1	13	17310.6	0
5589	PRKCSH	13	17222.2	0
6194	RPS6	13	16935.6	0
6125	RPL5	13	16327.3	0
6083	SNORD21	13	16327.3	0
6175	RPLP0	13	16243	0
1196	CLK2	13	15965	0
2033	EP300	13	15764.5	0
6789	STK4	13	15139.6	0
7321	UBE2D1	13	14757.8	0
2521	FUS	13	14295.1	0
51035	UBXN1	13	13590.7	0
5884	RAD17	13	12600.7	0
84172	POLR1B	13	12049.1	0
25855	BRMS1	13	11899.3	0
619565	SNORA52	13	11772.5	0
2935	GSPT1	13	11711.4	0
4093	SMAD9	13	11084.2	0
84310	C7orf50	13	10313.5	0
116938	SNORD83B	13	8444.85	0
116936	RNU86	13	8444.85	0
6122	RPL3	13	8444.85	0
5537	PPP6C	13	7718.65	0
5603	MAPK13	13	6865.29	0
8503	PIK3R3	13	6599.05	0
1024	CDK8	13	5972.58	0
920	CD4	13	5453.49	0
8450	CUL4B	13	5207.06	0
7750	ZMYM2	13	5141.51	0
26523	EIF2C1	13	4707.25	0
5241	PGR	13	4551.57	0
326	AIRE	13	4432.27	0
23162	MAPK8IP3	13	4154.62	0
7468	WHSC1	13	2487.71	0
93185	IGSF8	13	2107.17	0
2006	ELN	12	50529	0
10454	TAB1	12	36729.8	0
8985	PLOD3	12	34588.1	0
26086	GPSM1	12	33439.3	0
51377	UCHL5	12	31670.1	0
6129	RPL7	12	30070.8	0
102	ADAM10	12	29729	0
54850	FBXL12	12	29214.5	0
432	ASGR1	12	28596.4	0
4952	OCRL	12	28279.1	0
11284	PNKP	12	27022	0
57159	TRIM54	12	26348.2	0
9454	HOMER3	12	26215.2	0
23645	PPP1R15A	12	25566.8	0
10190	TXNDC9	12	25368.4	0
5315	PKM2	12	23279.4	0
7391	USF1	12	23214.1	0
6710	SPTB	12	22926.1	0
8498	RANBP3	12	22575.5	0
7709	ZBTB17	12	22034.6	0
6446	SGK1	12	21554	0
26795	SNORD54	12	20150.8	0
6224	RPS20	12	20150.8	0
8939	FUBP3	12	19786.5	0
55041	PLEKHB2	12	19457.9	0
79184	BRCC3	12	19296.5	0
6208	RPS14	12	19038.1	0
23636	NUP62	12	16991.5	0
71	ACTG1	12	16606.2	0
5534	PPP3R1	12	16312.8	0
9604	RNF14	12	16023.9	0
3866	KRT15	12	14710.7	0
9666	DZIP3	12	14608.5	0
1019	CDK4	12	14536.1	0
80010	RMI1	12	14014.8	0
4233	MET	12	13890.4	0
4719	NDUFS1	12	13661	0
302	ANXA2	12	13528.5	0
23451	SF3B1	12	13500.8	0
4105	MAGEA6	12	13348	0
27161	EIF2C2	12	12923.7	0
6606	SMN1	12	12909	0
51808	PHAX	12	12688.1	0
6923	TCEB2	12	12448	0
9500	MAGED1	12	12446.1	0
6607	SMN2	12	12409.7	0
4734	NEDD4	12	12149.4	0
90480	GADD45GIP1	12	12131.4	0
10771	ZMYND11	12	12035.1	0
80854	SETD7	12	11489	0
1832	DSP	12	10857.2	0
1460	CSNK2B	12	10810.7	0
773	CACNA1A	12	10668.9	0
100507353	LOC100507353	12	10668.9	0
1917	EEF1A2	12	9757.61	0
373	TRIM23	12	9487.14	0
2289	FKBP5	12	9430.21	0
2950	GSTP1	12	9121.79	0
5710	PSMD4	12	8911.19	0
29766	TMOD3	12	8859.88	0
5595	MAPK3	12	8826.49	0
23542	MAPK8IP2	12	7929.52	0
1601	DAB2	12	7814.65	0
79058	ASPSCR1	12	7453.99	0
7083	TK1	12	6481.75	0
23186	RCOR1	12	6203.91	0
6117	RPA1	12	6102.41	0
8726	EED	12	5321.13	0
7014	TERF2	12	4253.31	0
10116	FEM1B	12	3988.31	0
648	BMI1	12	3708.36	0
100532731	COMMD3-BMI1	12	3708.36	0
1018	CDK3	12	3062.68	0
7155	TOP2B	12	2885.55	0
55763	EXOC1	11	41857.6	0
5910	RAP1GDS1	11	34850.3	0
596	BCL2	11	32458.3	0
87	ACTN1	11	27685	0
8027	STAM	11	26718.4	0
6449	SGTA	11	26619.8	0
5590	PRKCZ	11	25113.9	0
5564	PRKAB1	11	23089.5	0
55700	MAP7D1	11	22924.2	0
9253	NUMBL	11	21728.4	0
10787	NCKAP1	11	21006.4	0
9915	ARNT2	11	20456.5	0
1535	CYBA	11	20397.1	0
3301	DNAJA1	11	19863.6	0
11151	CORO1A	11	19341.2	0
79656	BEND5	11	18611.7	0
80125	CCDC33	11	18488.5	0
57003	CCDC47	11	18063.9	0
4924	NUCB1	11	18045.1	0
9618	TRAF4	11	17677.8	0
6733	SRPK2	11	17087.8	0
10938	EHD1	11	16511.3	0
65018	PINK1	11	16081	0
3337	DNAJB1	11	15759.2	0
3998	LMAN1	11	15717.3	0
3066	HDAC2	11	15668.7	0
10413	YAP1	11	15347.2	0
1062	CENPE	11	14373.9	0
8525	DGKZ	11	14296.8	0
10013	HDAC6	11	13554.6	0
51807	TUBA8	11	13022.4	0
64787	EPS8L2	11	12839.3	0
2023	ENO1	11	12464.5	0
6502	SKP2	11	12418.2	0
219333	USP12	11	12087.2	0
6456	SH3GL2	11	12007	0
4739	NEDD9	11	11958.4	0
10043	TOM1	11	11718.5	0
7681	MKRN3	11	11629.2	0
310	ANXA7	11	11604.2	0
5699	PSMB10	11	11573.6	0
10558	SPTLC1	11	11457.1	0
3164	NR4A1	11	11401.4	0
203068	TUBB	11	11352.5	0
2353	FOS	11	11239	0
4627	MYH9	11	10847.2	0
3184	HNRNPD	11	10676.8	0
7411	VBP1	11	10635.1	0
6050	RNH1	11	10075.7	0
116985	ARAP1	11	9501.06	0
5829	PXN	11	9151.87	0
5499	PPP1CA	11	9071.45	0
23192	ATG4B	11	8378.03	0
11215	AKAP11	11	8361.79	0
1387	CREBBP	11	7708.36	0
322	APBB1	11	7578.18	0
6921	TCEB1	11	6916.89	0
83858	ATAD3B	11	6359.88	0
1386	ATF2	11	6344.42	0
9685	CLINT1	11	5133.18	0
64129	TINAGL1	11	5099.89	0
4089	SMAD4	11	4871.19	0
10250	SRRM1	11	4184.58	0
9138	ARHGEF1	11	4123.05	0
6147	RPL23A	11	4006.69	0
26809	SNORD42A	11	4006.69	0
115992	RNF166	11	3896.72	0
25998	IBTK	11	3515.18	0
55588	MED29	11	3492.14	0
2688	GH1	11	3465.9	0
440738	MAP1LC3C	11	3455.12	0
51663	ZFR	11	3090.4	0
22913	RALY	11	2808.12	0
64431	ACTR6	11	2599.77	0
9969	MED13	11	2030.65	0
1191	CLU	10	54346	0
10253	SPRY2	10	42293.6	0
6709	SPTAN1	10	36206.4	0
10155	TRIM28	10	25575.7	0
55593	OTUD5	10	24416.2	0
122809	SOCS4	10	23999.3	0
2026	ENO2	10	22961.4	0
506	ATP5B	10	20573.4	0
387	RHOA	10	20230.9	0
64750	SMURF2	10	17814	0
246175	CNOT6L	10	17179.2	0
7022	TFAP2C	10	16031.8	0
7707	ZNF148	10	15955.8	0
4437	MSH3	10	15429.5	0
204851	HIPK1	10	15233.7	0
84970	C1orf94	10	13861.9	0
5111	PCNA	10	13720.2	0
6421	SFPQ	10	13611	0
7329	UBE2I	10	12697.9	0
27072	VPS41	10	12590.2	0
8721	EDF1	10	12563.1	0
10944	C11orf58	10	12497.8	0
80321	CEP70	10	11988.8	0
55333	SYNJ2BP	10	11890.3	0
10241	CALCOCO2	10	11860.6	0
6908	TBP	10	11534.9	0
25970	SH2B1	10	11421.9	0
6811	STX5	10	11390.4	0
51003	MED31	10	11230	0
10572	SIVA1	10	11197.6	0
708	C1QBP	10	11195.1	0
5981	RFC1	10	10975.3	0
6839	SUV39H1	10	10849.9	0
26576	SRPK3	10	10838.3	0
91544	UBXN11	10	10674.1	0
5879	RAC1	10	10609.7	0
51361	HOOK1	10	10485.9	0
2286	FKBP2	10	10377	0
23244	PDS5A	10	10337	0
6210	RPS15A	10	10040.2	0
26227	PHGDH	10	9829.1	0
1051	CEBPB	10	9734.18	0
9021	SOCS3	10	9717.6	0
207	AKT1	10	9371.81	0
26190	FBXW2	10	9367.49	0
54431	DNAJC10	10	9303.44	0
5783	PTPN13	10	9281.85	0
8841	HDAC3	10	9111.53	0
55161	TMEM33	10	8903.76	0
8723	SNX4	10	8841.97	0
113457	TUBA3D	10	8831.99	0
54472	TOLLIP	10	8787.23	0
4217	MAP3K5	10	8645.35	0
23164	MPRIP	10	8365.74	0
1107	CHD3	10	8312.38	0
6232	RPS27	10	8177.89	0
51177	PLEKHO1	10	8162	0
6202	RPS8	10	8022.08	0
94163	SNORD38B	10	8022.08	0
26811	SNORD55	10	8022.08	0
652965	SNORA48	10	7868.7	0
1973	EIF4A1	10	7868.7	0
652966	SNORD10	10	7868.7	0
26781	SNORA67	10	7868.7	0
6294	SAFB	10	7624.81	0
27101	CACYBP	10	7563.95	0
79169	C1orf35	10	7458.22	0
1161	ERCC8	10	7417.63	0
9447	AIM2	10	7243.75	0
7409	VAV1	10	6842.79	0
554313	HIST2H4B	10	6537.54	0
8294	HIST1H4I	10	6537.54	0
8359	HIST1H4A	10	6537.54	0
8364	HIST1H4C	10	6537.54	0
8360	HIST1H4D	10	6537.54	0
8363	HIST1H4J	10	6537.54	0
8365	HIST1H4H	10	6537.54	0
8366	HIST1H4B	10	6537.54	0
8370	HIST2H4A	10	6537.54	0
8361	HIST1H4F	10	6537.54	0
8362	HIST1H4K	10	6537.54	0
8367	HIST1H4E	10	6537.54	0
121504	HIST4H4	10	6537.54	0
8368	HIST1H4L	10	6537.54	0
4215	MAP3K3	10	6358.35	0
5725	PTBP1	10	6071.62	0
100616459	MIR4745	10	6071.62	0
1647	GADD45A	10	5793.93	0
6651	SON	10	4662.82	0
6696	SPP1	10	4231.2	0
23043	TNIK	10	3439.81	0
8533	COPS3	10	3183.36	0
1050	CEBPA	10	2755.29	0
57448	BIRC6	10	2658.7	0
1965	EIF2S1	10	2035.12	0
9631	NUP155	10	1962.01	0
8669	EIF3J	10	1746.82	0
10848	PPP1R13L	10	1604.43	0
9775	EIF4A3	10	1228.52	0
79727	LIN28A	10	996.01	0
2159	F10	9	28854.9	0
467	ATF3	9	25166.8	0
100302736	TMED7-TICAM2	9	24706.3	0
1815	DRD4	9	23312.7	0
6237	RRAS	9	22811.8	0
51690	LSM7	9	22612.8	0
5310	PKD1	9	22462	0
3880	KRT19	9	22355.7	0
10040	TOM1L1	9	21475.6	0
85456	TNKS1BP1	9	20495.9	0
9217	VAPB	9	20333.6	0
1969	EPHA2	9	20016.2	0
10783	NEK6	9	19486.9	0
5292	PIM1	9	18558.4	0
4750	NEK1	9	18260.7	0
3156	HMGCR	9	17769	0
9189	ZBED1	9	17723	0
10951	CBX1	9	16653.4	0
60592	SCOC	9	16166.2	0
8615	USO1	9	16032	0
23396	PIP5K1C	9	15909.6	0
8848	TSC22D1	9	15869.7	0
9329	GTF3C4	9	15494.1	0
6047	RNF4	9	15456.1	0
10492	SYNCRIP	9	14919.4	0
6517	SLC2A4	9	14392.7	0
993	CDC25A	9	14321.8	0
9025	RNF8	9	13976.9	0
5058	PAK1	9	13834.1	0
10522	DEAF1	9	13248.2	0
23386	NUDCD3	9	13168.2	0
7251	TSG101	9	12608.8	0
5966	REL	9	12444.9	0
54437	SEMA5B	9	12321	0
23650	TRIM29	9	12152.9	0
6303	SAT1	9	12081.7	0
3852	KRT5	9	12022.6	0
9319	TRIP13	9	11935	0
55197	RPRD1A	9	11217.3	0
7203	CCT3	9	11056.5	0
220082	SPERT	9	11029	0
867	CBL	9	10814.8	0
166	AES	9	10632.6	0
7314	UBB	9	10599.2	0
7015	TERT	9	10514.1	0
5529	PPP2R5E	9	10472.1	0
1020	CDK5	9	10421.3	0
6732	SRPK1	9	10276.2	0
5987	TRIM27	9	10259.3	0
3397	ID1	9	10231.3	0
202559	KHDRBS2	9	10207.5	0
3192	HNRNPU	9	10182.3	0
2065	ERBB3	9	10121.9	0
641	BLM	9	9996.7	0
6782	HSPA13	9	9825.27	0
5494	PPM1A	9	9730.48	0
7755	ZNF205	9	9516.23	0
4035	LRP1	9	9507.71	0
4005	LMO2	9	9452.49	0
80155	NAA15	9	9420.96	0
2072	ERCC4	9	9283.3	0
57562	KIAA1377	9	9212.69	0
79228	THOC6	9	9095.78	0
7019	TFAM	9	8833.5	0
2801	GOLGA2	9	8718.48	0
9001	HAP1	9	8301.41	0
128	ADH5	9	8289.36	0
7278	TUBA3C	9	8200.5	0
8826	IQGAP1	9	8046.73	0
10483	SEC23B	9	7983.58	0
84727	SPSB2	9	7815.01	0
7975	MAFK	9	7749.39	0
10605	PAIP1	9	7715.45	0
2475	MTOR	9	7538.95	0
51150	SDF4	9	7260.02	0
9532	BAG2	9	7195.24	0
55679	LIMS2	9	6973.36	0
3183	HNRNPC	9	6960.14	0
2534	FYN	9	6756.28	0
9093	DNAJA3	9	5736.08	0
1104	RCC1	9	5573.1	0
5728	PTEN	9	5517.36	0
860	RUNX2	9	5440.48	0
10589	DRAP1	9	5389.88	0
3309	HSPA5	9	5255.26	0
3646	EIF3E	9	4982.66	0
6720	SREBF1	9	4933.13	0
50813	COPS7A	9	4923.65	0
6205	RPS11	9	4913.09	0
2197	FAU	9	4852.65	0
5424	POLD1	9	4851.78	0
100528062	ARMCX5-GPRASP2	9	4617.43	0
114928	GPRASP2	9	4617.43	0
6498	SKIL	9	4476.62	0
81608	FIP1L1	9	4420.99	0
148581	UBE2U	9	4351.62	0
51763	INPP5K	9	4194.38	0
3065	HDAC1	9	4069.9	0
4311	MME	9	4053.73	0
10044	SH2D3C	9	4029.01	0
3187	HNRNPH1	9	3974.81	0
619505	SNORA21	9	3930.36	0
9349	RPL23	9	3930.36	0
65125	WNK1	9	3917.26	0
171483	FAM9B	9	3629.45	0
122953	JDP2	9	3393.21	0
5925	RB1	9	3168.27	0
3306	HSPA2	9	3013.43	0
27067	STAU2	9	2915.13	0
7764	ZNF217	9	2679.91	0
6222	RPS18	9	2356.91	0
11260	XPOT	9	2307.79	0
5105	PCK1	9	2140.92	0
79585	CORO7	9	1919.26	0
525	ATP6V1B1	9	1673.18	0
8412	BCAR3	9	1672.56	0
768	CA9	9	1526.22	0
7067	THRA	9	1445.87	0
55681	SCYL2	9	1242.68	0
4116	MAGOH	9	1235.35	0
10664	CTCF	9	1142.71	0
57333	RCN3	8	25718.6	0
974	CD79B	8	23357.6	0
90678	LRSAM1	8	22090	0
7296	TXNRD1	8	21950.9	0
154796	AMOT	8	19365.1	0
8940	TOP3B	8	19061.3	0
7163	TPD52	8	18195.4	0
6778	STAT6	8	17541.7	0
56852	RAD18	8	17036.6	0
7159	TP53BP2	8	16421.5	0
4670	HNRNPM	8	16241.7	0
9131	AIFM1	8	16015.8	0
2309	FOXO3	8	15483.8	0
4913	NTHL1	8	15228.4	0
5684	PSMA3	8	14610.1	0
64098	PARVG	8	14253.3	0
55109	AGGF1	8	13743.2	0
2308	FOXO1	8	13451.9	0
5604	MAP2K1	8	13220.4	0
6236	RRAD	8	13045.8	0
283899	INO80E	8	12536.8	0
51701	NLK	8	12313.5	0
1612	DAPK1	8	12252.6	0
124997	WDR81	8	12084	0
8601	RGS20	8	12020.3	0
23471	TRAM1	8	12006.3	0
2130	EWSR1	8	11912.8	0
79843	FAM124B	8	11863.9	0
2624	GATA2	8	11554.1	0
23014	FBXO21	8	11329.7	0
9040	UBE2M	8	11040.2	0
998	CDC42	8	10917	0
3939	LDHA	8	10893.6	0
7430	EZR	8	10809.1	0
27185	DISC1	8	10806.7	0
3551	IKBKB	8	10605.1	0
9134	CCNE2	8	10515.2	0
5093	PCBP1	8	10342.5	0
57379	AICDA	8	10242.1	0
6477	SIAH1	8	10006.3	0
5862	RAB2A	8	9925.89	0
5599	MAPK8	8	9866.47	0
9230	RAB11B	8	9844.72	0
10963	STIP1	8	9689.79	0
8553	BHLHE40	8	9601.59	0
1891	ECH1	8	9536.91	0
84033	OBSCN	8	9381.54	0
10607	TBL3	8	9177.62	0
80781	COL18A1	8	9041.87	0
7158	TP53BP1	8	8997.25	0
23136	EPB41L3	8	8985.97	0
10955	SERINC3	8	8831.5	0
6929	TCF3	8	8723.94	0
79084	WDR77	8	8714.8	0
1072	CFL1	8	8625.1	0
898	CCNE1	8	8615.73	0
5693	PSMB5	8	8475.64	0
6843	VAMP1	8	8418.3	0
26524	LATS2	8	8362.01	0
54606	DDX56	8	8319.87	0
2553	GABPB1	8	8274.98	0
23466	CBX6	8	8240.03	0
8926	SNURF	8	8214.87	0
6638	SNRPN	8	8214.87	0
9584	RBM39	8	7792.68	0
11243	PMF1	8	7717.25	0
29086	BABAM1	8	7665.35	0
1642	DDB1	8	7304.4	0
27339	PRPF19	8	7260.58	0
100616387	MIR3064	8	7227.43	0
1655	DDX5	8	7227.43	0
100616408	MIR5047	8	7227.43	0
51574	LARP7	8	7172.16	0
100500842	MIR3652	8	6987.58	0
7184	HSP90B1	8	6987.58	0
91369	ANKRD40	8	6952.89	0
9212	AURKB	8	6809.45	0
50855	PARD6A	8	6698.92	0
6156	RPL30	8	6554.96	0
79586	CHPF	8	6496.63	0
56658	TRIM39	8	6453.04	0
202658	TRIM39-RPP21	8	6453.04	0
3861	KRT14	8	6426.8	0
27125	AFF4	8	6345.61	0
692199	SNORD84	8	6259.74	0
7919	DDX39B	8	6259.74	0
9094	UNC119	8	6239.75	0
6873	TAF2	8	6215.8	0
2261	FGFR3	8	6170.11	0
767558	LUZP6	8	5933.87	0
10095	ARPC1B	8	5744.32	0
23624	CBLC	8	5534.67	0
238	ALK	8	5170.06	0
4092	SMAD7	8	5001.41	0
1025	CDK9	8	4939.23	0
7322	UBE2D2	8	4938.85	0
6193	RPS5	8	4787.52	0
23028	KDM1A	8	4680.08	0
10376	TUBA1B	8	4641.33	0
26814	SNORD36B	8	4632.84	0
26820	SNORD24	8	4632.84	0
26815	SNORD36A	8	4632.84	0
6130	RPL7A	8	4632.84	0
2547	XRCC6	8	4501.25	0
11316	COPE	8	4432.31	0
10382	TUBB4A	8	4241.54	0
2113	ETS1	8	4133.18	0
1398	CRK	8	4095.47	0
868	CBLB	8	3864.32	0
29920	PYCR2	8	3734.69	0
267	AMFR	8	3694.93	0
6154	RPL26	8	3611.51	0
10735	STAG2	8	3534.47	0
5782	PTPN12	8	3523.03	0
6256	RXRA	8	3471.76	0
9894	TELO2	8	3457.28	0
6259	RYK	8	3397.54	0
301	ANXA1	8	3172.49	0
2908	NR3C1	8	3105.32	0
752	FMNL1	8	3020.22	0
5716	PSMD10	8	2784.17	0
1114	CHGB	8	2773.68	0
1400	CRMP1	8	2340.55	0
23411	SIRT1	8	2183.44	0
10393	ANAPC10	8	2149.17	0
2107	ETF1	8	2097.76	0
23097	CDK19	8	2079.92	0
10314	LANCL1	8	1992.05	0
2181	ACSL3	8	1958.02	0
5252	PHF1	8	1913.13	0
4066	LYL1	8	1665.05	0
64780	MICAL1	8	1573.6	0
837	CASP4	8	1513.36	0
5036	PA2G4	8	1503	0
9861	PSMD6	8	1479.41	0
4650	MYO9B	8	1313.37	0
57418	WDR18	8	1197.97	0
6917	TCEA1	8	1143.55	0
23196	FAM120A	8	1132.66	0
7405	UVRAG	8	1115.03	0
81542	TMX1	8	1001.41	0
1431	CS	8	878.52	0
37	ACADVL	8	702.22	0
10398	MYL9	8	597.86	0
22890	ZBTB1	8	379.61	0
26792	SNORD57	8	357.25	0
10528	NOP56	8	357.25	0
692213	SNORD110	8	357.25	0
100302138	MIR1292	8	357.25	0
692201	SNORD86	8	357.25	0
9470	EIF4E2	7	28058.9	0
64852	TUT1	7	24938.1	0
5582	PRKCG	7	24667.5	0
55207	ARL8B	7	23600.3	0
23243	ANKRD28	7	23161.1	0
5129	CDK18	7	22635.4	0
7515	XRCC1	7	21629.9	0
79095	C9orf16	7	21325.5	0
83605	CCM2	7	21266.2	0
9689	BZW1	7	19416.7	0
1639	DCTN1	7	16576.5	0
10287	RGS19	7	15504.8	0
9739	SETD1A	7	15504	0
5866	RAB3IL1	7	15353.9	0
11344	TWF2	7	15246.9	0
9527	GOSR1	7	15155.8	0
6597	SMARCA4	7	14655.2	0
64343	AZI2	7	14580.2	0
57697	FANCM	7	14286.8	0
11236	RNF139	7	14081.9	0
64795	RMND5A	7	12323.3	0
4763	NF1	7	12196.8	0
8204	NRIP1	7	11391.6	0
50484	RRM2B	7	11337	0
2059	EPS8	7	11031.1	0
27342	RABGEF1	7	10861.1	0
3692	EIF6	7	10174.6	0
3267	AGFG1	7	10120.7	0
1877	E4F1	7	10079.1	0
1600	DAB1	7	9773.65	0
54461	FBXW5	7	9519.35	0
4846	NOS3	7	9430.58	0
3688	ITGB1	7	9254.17	0
51588	PIAS4	7	9181.46	0
55611	OTUB1	7	9104.78	0
1742	DLG4	7	8798.79	0
4659	PPP1R12A	7	8651.66	0
91653	BOC	7	8585	0
2516	NR5A1	7	8363.99	0
1778	DYNC1H1	7	8327.99	0
2060	EPS15	7	8314.16	0
3783	KCNN4	7	8285.79	0
5705	PSMC5	7	8279.11	0
5356	PLRG1	7	8262.87	0
283742	FAM98B	7	8082.28	0
9778	KIAA0232	7	7840.82	0
7185	TRAF1	7	7784.47	0
7188	TRAF5	7	7764.24	0
8425	LTBP4	7	7686.32	0
8045	RASSF7	7	7553.92	0
51552	RAB14	7	7533.15	0
10919	EHMT2	7	7524.51	0
6814	STXBP3	7	7405.05	0
104	ADARB1	7	7363.65	0
3480	IGF1R	7	7089.63	0
116138	KLHDC3	7	7009.73	0
84078	KBTBD7	7	6925.34	0
3717	JAK2	7	6680.79	0
5784	PTPN14	7	6551.99	0
28988	DBNL	7	6476.25	0
4176	MCM7	7	6275.54	0
23394	ADNP	7	6141.65	0
7276	TTR	7	6131.12	0
7325	UBE2E2	7	5943.1	0
490	ATP2B1	7	5790.35	0
23390	ZDHHC17	7	5758.22	0
5159	PDGFRB	7	5730.86	0
8664	EIF3D	7	5584.38	0
11161	C14orf1	7	5579.99	0
27238	GPKOW	7	5429.1	0
55791	LRIF1	7	5397.91	0
580	BARD1	7	5368.62	0
10018	BCL2L11	7	5365.84	0
10284	SAP18	7	5361.95	0
5110	PCMT1	7	5255.53	0
80212	CCDC92	7	5146.1	0
6201	RPS7	7	4795.48	0
54550	NECAB2	7	4661.86	0
55743	CHFR	7	4656.51	0
1503	CTPS	7	4515.59	0
51073	MRPL4	7	4443.85	0
1163	CKS1B	7	4441.02	0
6143	RPL19	7	4347.46	0
7161	TP73	7	4161.34	0
4690	NCK1	7	4070.71	0
375790	AGRN	7	3939.24	0
57144	PAK7	7	3934.35	0
595098	SNORD18A	7	3887.07	0
6124	RPL4	7	3887.07	0
595099	SNORD18B	7	3887.07	0
595097	SNORD16	7	3887.07	0
595100	SNORD18C	7	3887.07	0
84254	CAMKK1	7	3877.82	0
57787	MARK4	7	3841.74	0
9659	PDE4DIP	7	3761.85	0
728802	LOC728802	7	3761.85	0
6133	RPL9	7	3758.15	0
10397	NDRG1	7	3737.73	0
163	AP2B1	7	3685.41	0
5997	RGS2	7	3660.08	0
2806	GOT2	7	3569.64	0
6136	RPL12	7	3457.48	0
55182	RNF220	7	3392.36	0
1326	MAP3K8	7	3390.85	0
25937	WWTR1	7	3302.65	0
84140	FAM161A	7	3269.32	0
5935	RBM3	7	3230.06	0
219541	MED19	7	3165.52	0
51070	NOSIP	7	3017.51	0
1399	CRKL	7	2998.03	0
9064	MAP3K6	7	2947.07	0
5621	PRNP	7	2913.36	0
6238	RRBP1	7	2910.54	0
7324	UBE2E1	7	2792.47	0
1039	CDR2	7	2785.81	0
4736	RPL10A	7	2756.42	0
81	ACTN4	7	2755.74	0
9444	QKI	7	2683.72	0
6613	SUMO2	7	2645.55	0
2091	FBL	7	2613.07	0
51647	FAM96B	7	2611.76	0
8773	SNAP23	7	2603.75	0
10010	TANK	7	2541.36	0
5702	PSMC3	7	2477.75	0
6128	RPL6	7	2442.35	0
24140	FTSJ1	7	2441.07	0
6230	RPS25	7	2418.37	0
1942	EFNA1	7	2388.86	0
5978	REST	7	2378.09	0
619569	SNORA41	7	2373.39	0
1933	EEF1B2	7	2373.39	0
10910	SUGT1	7	2183.27	0
51719	CAB39	7	2156.68	0
29843	SENP1	7	2137.09	0
6497	SKI	7	2132.1	0
26234	FBXL5	7	2130.39	0
8667	EIF3H	7	2063.45	0
2623	GATA1	7	2048.66	0
2186	BPTF	7	2021.2	0
123169	LEO1	7	1965.25	0
405	ARNT	7	1939.15	0
9149	DYRK1B	7	1917.12	0
8877	SPHK1	7	1700.25	0
83932	C1orf124	7	1671.21	0
25929	GEMIN5	7	1599.22	0
84188	FAR1	7	1583.81	0
6416	MAP2K4	7	1557.44	0
114897	C1QTNF1	7	1533.95	0
3815	KIT	7	1531.64	0
9716	AQR	7	1494.9	0
81794	ADAMTS10	7	1488.67	0
10746	MAP3K2	7	1479.16	0
54984	PINX1	7	1409.64	0
30851	TAX1BP3	7	1339.21	0
9255	AIMP1	7	1330.88	0
64682	ANAPC1	7	1263.41	0
10196	PRMT3	7	1226.74	0
55366	LGR4	7	1131.37	0
5261	PHKG2	7	983.57	0
26260	FBXO25	7	739.63	0
1105	CHD1	7	492.33	0
54958	TMEM160	7	385.27	0
54797	MED18	7	314.48	0
53339	BTBD1	7	220.98	0
10555	AGPAT2	6	27773.3	0
114990	VASN	6	27195.8	0
170463	SSBP4	6	23081.4	0
10730	YME1L1	6	21039.2	0
3299	HSF4	6	20961.2	0
9399	STOML1	6	20949	0
51582	AZIN1	6	20819.1	0
3006	HIST1H1C	6	17705.9	0
2669	GEM	6	16617.3	0
1327	COX4I1	6	16242.3	0
137886	UBXN2B	6	15177.5	0
51606	ATP6V1H	6	14872.6	0
8411	EEA1	6	14638.3	0
7134	TNNC1	6	14469.5	0
84640	USP38	6	14100.3	0
5528	PPP2R5D	6	14089.1	0
10811	NOXA1	6	14066.1	0
7099	TLR4	6	14051.3	0
2175	FANCA	6	14050.7	0
4046	LSP1	6	14024.9	0
55031	USP47	6	13378.2	0
129831	RBM45	6	12981.6	0
79735	TBC1D17	6	12503.4	0
10036	CHAF1A	6	12002.9	0
23321	TRIM2	6	11648.1	0
1629	DBT	6	11280.8	0
9729	KIAA0408	6	11085.9	0
7037	TFRC	6	10581.1	0
8655	DYNLL1	6	10423.1	0
1613	DAPK3	6	10397.5	0
8625	RFXANK	6	10138.2	0
80124	VCPIP1	6	9886.71	0
8774	NAPG	6	9738.62	0
9533	POLR1C	6	9670.56	0
57532	NUFIP2	6	9505.71	0
55819	RNF130	6	9269.55	0
51776	ZAK	6	9170.26	0
874	CBR3	6	9029.16	0
84280	BTBD10	6	8580.86	0
79872	CBLL1	6	8448.24	0
896	CCND3	6	8383.51	0
4131	MAP1B	6	8352.6	0
6150	MRPL23	6	8331.1	0
1739	DLG1	6	8245.74	0
27111	SDCBP2	6	8160.83	0
55156	ARMC1	6	8039.37	0
22872	SEC31A	6	7979.76	0
64145	ZFYVE20	6	7929.16	0
112755	STX1B	6	7914.85	0
84315	MON1A	6	7899.59	0
3385	ICAM3	6	7793.36	0
285971	ZNF775	6	7791.41	0
5566	PRKACA	6	7732.14	0
1455	CSNK1G2	6	7721.2	0
57805	KIAA1967	6	7697.86	0
54715	RBFOX1	6	7695.87	0
202051	SPATA24	6	7543.25	0
7247	TSN	6	7511.66	0
2923	PDIA3	6	7504.23	0
9330	GTF3C3	6	7485.16	0
11171	STRAP	6	7464.42	0
10758	TRAF3IP2	6	7440.55	0
6729	SRP54	6	7421.07	0
27158	NDOR1	6	7393.91	0
10933	MORF4L1	6	7298.42	0
10078	TSSC4	6	7277.88	0
1630	DCC	6	7277.43	0
374291	NDUFS7	6	7203.3	0
5214	PFKP	6	7182.79	0
7917	BAG6	6	7171.31	0
28964	GIT1	6	7055.85	0
10152	ABI2	6	7040.28	0
26263	FBXO22	6	7005.23	0
11043	MID2	6	6985.49	0
995	CDC25C	6	6947.09	0
10629	TAF6L	6	6938.6	0
51495	PTPLAD1	6	6830.09	0
23400	ATP13A2	6	6711.12	0
4641	MYO1C	6	6596.84	0
23066	CAND2	6	6390.11	0
22983	MAST1	6	6273.53	0
369	ARAF	6	6247.66	0
3091	HIF1A	6	6224.45	0
355	FAS	6	6194.63	0
6615	SNAI1	6	6028.16	0
8878	SQSTM1	6	6025.49	0
273	AMPH	6	5905.8	0
900	CCNG1	6	5778.64	0
23450	SF3B3	6	5758.05	0
4134	MAP4	6	5690.14	0
10445	MCRS1	6	5636.95	0
5565	PRKAB2	6	5504.63	0
495	ATP4A	6	5465.11	0
1487	CTBP1	6	5384.46	0
6631	SNRPC	6	5347.08	0
5800	PTPRO	6	5266.05	0
10059	DNM1L	6	5189.13	0
5579	PRKCB	6	5121.96	0
29781	NCAPH2	6	5010.92	0
5062	PAK2	6	4999.23	0
9801	MRPL19	6	4998.74	0
23406	COTL1	6	4960.01	0
10642	IGF2BP1	6	4829.02	0
27037	TRMT2A	6	4808.77	0
4666	NACA	6	4777.28	0
8976	WASL	6	4702.91	0
7408	VASP	6	4679.41	0
3860	KRT13	6	4668.81	0
873	CBR1	6	4653.06	0
3856	KRT8	6	4581.7	0
10498	CARM1	6	4561.91	0
54776	PPP1R12C	6	4498.9	0
147687	ZNF417	6	4414.14	0
5567	PRKACB	6	4357.27	0
22920	KIFAP3	6	4283.84	0
10381	TUBB3	6	4245.7	0
5335	PLCG1	6	4242.95	0
4004	LMO1	6	4163.51	0
8803	SUCLA2	6	4153.56	0
26999	CYFIP2	6	4131.26	0
4194	MDM4	6	4123.3	0
92609	TIMM50	6	4048.75	0
6132	RPL8	6	3980.33	0
138474	TAF1L	6	3942.19	0
407043	MIR7-1	6	3912.59	0
25824	PRDX5	6	3885.73	0
29978	UBQLN2	6	3876.84	0
498	ATP5A1	6	3836.53	0
192669	EIF2C3	6	3827.99	0
78990	OTUB2	6	3772.82	0
389677	RBM12B	6	3732.03	0
7289	TULP3	6	3658.73	0
9111	NMI	6	3658.02	0
7525	YES1	6	3645.66	0
4140	MARK3	6	3616.36	0
5795	PTPRJ	6	3381.22	0
7341	SUMO1	6	3338.78	0
10320	IKZF1	6	3297.85	0
29117	BRD7	6	3286.13	0
8676	STX11	6	3283.47	0
9802	DAZAP2	6	3242.13	0
23373	CRTC1	6	3226.21	0
64753	CCDC136	6	3174.18	0
1488	CTBP2	6	3160.25	0
8440	NCK2	6	3151.08	0
9770	RASSF2	6	3066.44	0
9815	GIT2	6	3058.77	0
3667	IRS1	6	3018.98	0
11335	CBX3	6	3014.87	0
1616	DAXX	6	3012.73	0
10134	BCAP31	6	2870.87	0
192111	PGAM5	6	2865.01	0
7326	UBE2G1	6	2708.91	0
113251	LARP4	6	2647.75	0
57695	USP37	6	2611.99	0
100616371	MIR4746	6	2554.38	0
4691	NCL	6	2545.52	0
8480	RAE1	6	2519.98	0
51421	AMOTL2	6	2515.52	0
5581	PRKCE	6	2404.31	0
6165	RPL35A	6	2374.23	0
6428	SRSF3	6	2304.42	0
5524	PPP2R4	6	2279.4	0
5094	PCBP2	6	2265.69	0
84790	TUBA1C	6	2249.25	0
55145	THAP1	6	2156.94	0
5442	POLRMT	6	2148.7	0
55605	KIF21A	6	2148.61	0
6097	RORC	6	2129.45	0
5933	RBL1	6	2109.99	0
57521	RPTOR	6	2086.29	0
991	CDC20	6	1954.57	0
9657	IQCB1	6	1832.4	0
55288	RHOT1	6	1814.05	0
11224	RPL35	6	1804.31	0
226	ALDOA	6	1785.11	0
830	CAPZA2	6	1778.14	0
574040	SNORA6	6	1738.39	0
3921	RPSA	6	1738.39	0
6044	SNORA62	6	1738.39	0
5872	RAB13	6	1660.5	0
100506403	LOC100506403	6	1651.29	0
861	RUNX1	6	1651.29	0
5331	PLCB3	6	1627.17	0
55969	C20orf24	6	1554.24	0
6525	SMTN	6	1510.86	0
285527	FRYL	6	1508.55	0
8856	NR1I2	6	1490.42	0
4794	NFKBIE	6	1475.35	0
57664	PLEKHA4	6	1430.33	0
8900	CCNA1	6	1418.5	0
28996	HIPK2	6	1412.94	0
6229	RPS24	6	1372.97	0
6207	RPS13	6	1371.91	0
100508408	LOC100508408	6	1371.91	0
85388	SNORD14B	6	1371.91	0
30827	CXXC1	6	1370.87	0
1999	ELF3	6	1352.68	0
6468	FBXW4	6	1338.78	0
3796	KIF2A	6	1311.85	0
222229	LRWD1	6	1311.66	0
29904	EEF2K	6	1297.49	0
196403	DTX3	6	1280.28	0
6160	RPL31	6	1230.19	0
50619	DEF6	6	1141.42	0
87178	PNPT1	6	1138.23	0
2114	ETS2	6	1011.82	0
27338	UBE2S	6	941.81	0
10426	TUBGCP3	6	907.03	0
7266	DNAJC7	6	903.65	0
7841	MOGS	6	898.26	0
51162	EGFL7	6	823.85	0
578	BAK1	6	820.54	0
5704	PSMC4	6	809.3	0
4054	LTBP3	6	809.22	0
58	ACTA1	6	797.9	0
3636	INPPL1	6	753.14	0
6886	TAL1	6	752.22	0
22870	PPP6R1	6	508.62	0
5713	PSMD7	6	407.48	0
80227	PAAF1	6	340.31	0
55646	LYAR	6	126.02	0
5663	PSEN1	5	35963.3	0
23369	PUM2	5	27730	0
7879	RAB7A	5	22989.9	0
7979	SHFM1	5	21804.3	0
340359	KLHL38	5	19019.4	0
80333	KCNIP4	5	16962.7	0
126003	TRAPPC5	5	15457.8	0
117177	RAB3IP	5	15016.7	0
3679	ITGA7	5	14934.3	0
391	RHOG	5	14840.5	0
5859	QARS	5	14805.5	0
23499	MACF1	5	14672.7	0
9372	ZFYVE9	5	14597.7	0
147746	HIPK4	5	14486	0
29941	PKN3	5	14458.6	0
5479	PPIB	5	14418.2	0
23098	SARM1	5	14317.4	0
57542	KLHDC5	5	14224.2	0
2740	GLP1R	5	14219.6	0
90850	ZNF598	5	14092.5	0
9575	CLOCK	5	14024.9	0
901	CCNG2	5	14022	0
23166	STAB1	5	13996.2	0
122786	FRMD6	5	12936.3	0
9853	RUSC2	5	12160.5	0
1780	DYNC1I1	5	12151.3	0
6835	SURF2	5	11321.2	0
6520	SLC3A2	5	10763.3	0
53944	CSNK1G1	5	10677.7	0
147700	KLC3	5	10185.5	0
402	ARL2	5	9909.5	0
9867	PJA2	5	9779.41	0
160	AP2A1	5	9695.27	0
9343	EFTUD2	5	9568.26	0
6169	RPL38	5	9515.24	0
7050	TGIF1	5	9491.13	0
63922	CHTF18	5	9335.4	0
79671	NLRX1	5	9258.34	0
4854	NOTCH3	5	9196.2	0
539	ATP5O	5	9195.21	0
3872	KRT17	5	9113.28	0
390	RND3	5	8994.55	0
81579	PLA2G12A	5	8897.85	0
23582	CCNDBP1	5	8799.43	0
10617	STAMBP	5	8663.27	0
5687	PSMA6	5	8658.94	0
79719	AAGAB	5	8584.27	0
4141	MARS	5	8548.84	0
8050	PDHX	5	8406.04	0
80019	UBTD1	5	8346.21	0
9869	SETDB1	5	8282.32	0
7106	TSPAN4	5	7992.58	0
83444	INO80B	5	7877.51	0
1540	CYLD	5	7756.51	0
4841	NONO	5	7726.28	0
25831	HECTD1	5	7620.92	0
9274	BCL7C	5	7433.3	0
51649	MRPS23	5	7408.57	0
51164	DCTN4	5	7336.31	0
8859	STK19	5	7274.68	0
2192	FBLN1	5	7271.82	0
116092	DNTTIP1	5	7246.24	0
8520	HAT1	5	7231.62	0
26277	TINF2	5	7229.08	0
92345	NAF1	5	7169.82	0
5286	PIK3C2A	5	7165.84	0
25939	SAMHD1	5	7140.51	0
2643	GCH1	5	7140.46	0
7293	TNFRSF4	5	7133.46	0
51397	COMMD10	5	6939.53	0
950	SCARB2	5	6931.68	0
9882	TBC1D4	5	6923.4	0
5648	MASP1	5	6786.67	0
8607	RUVBL1	5	6783.06	0
4170	MCL1	5	6582.14	0
22954	TRIM32	5	6054.94	0
6605	SMARCE1	5	5986	0
10928	RALBP1	5	5774.49	0
8178	ELL	5	5504.94	0
283349	RASSF3	5	5451.29	0
9581	PREPL	5	5424.6	0
1831	TSC22D3	5	5388.02	0
3716	JAK1	5	5210.54	0
2237	FEN1	5	5209.72	0
58477	SRPRB	5	5190.65	0
23344	ESYT1	5	5111.07	0
7168	TPM1	5	5053.79	0
4144	MAT2A	5	5005.68	0
7001	PRDX2	5	4888.65	0
11170	FAM107A	5	4702.18	0
5583	PRKCH	5	4684.37	0
2782	GNB1	5	4682.08	0
3615	IMPDH2	5	4498.36	0
1152	CKB	5	4473.17	0
8543	LMO4	5	4463.85	0
5682	PSMA1	5	4457.61	0
3891	KRT85	5	4440.72	0
55142	HAUS2	5	4373.19	0
22931	RAB18	5	4365.44	0
8569	MKNK1	5	4363	0
159989	CCDC67	5	4279.21	0
60485	SAV1	5	4254.1	0
200186	CRTC2	5	4214.12	0
29911	HOOK2	5	4193.35	0
6513	SLC2A1	5	4186.06	0
80028	FBXL18	5	4077.98	0
29888	STRN4	5	4044.43	0
2035	EPB41	5	4023.66	0
4036	LRP2	5	4006.93	0
2067	ERCC1	5	3977.89	0
4069	LYZ	5	3977.51	0
4236	MFAP1	5	3953.96	0
6616	SNAP25	5	3945.92	0
11051	NUDT21	5	3920.61	0
55132	LARP1B	5	3893.41	0
3603	IL16	5	3882.72	0
10427	SEC24B	5	3875.92	0
3336	HSPE1	5	3760.91	0
3310	HSPA6	5	3717.67	0
4110	MAGEA11	5	3707	0
3198	HOXA1	5	3684.13	0
10049	DNAJB6	5	3666.55	0
1459	CSNK2A2	5	3654.25	0
6228	RPS23	5	3633.23	0
57050	UTP3	5	3606.31	0
55968	NSFL1C	5	3554.01	0
5886	RAD23A	5	3544.91	0
63898	SH2D4A	5	3467.82	0
84959	UBASH3B	5	3431.54	0
5586	PKN2	5	3365.68	0
8349	HIST2H2BE	5	3358.95	0
55138	FAM90A1	5	3307.94	0
4261	CIITA	5	3295.19	0
23557	SNAPIN	5	3265.45	0
3839	KPNA3	5	3258.17	0
65993	MRPS34	5	3244.27	0
7804	LRP8	5	3228.54	0
51514	DTL	5	3186.86	0
3953	LEPR	5	3174.41	0
6195	RPS6KA1	5	3169.81	0
10198	MPHOSPH9	5	3166.8	0
10529	NEBL	5	3138.87	0
5216	PFN1	5	3107.86	0
8711	TNK1	5	3072.18	0
79723	SUV39H2	5	3050.57	0
5688	PSMA7	5	3035.5	0
92799	SHKBP1	5	3015.59	0
23118	TAB2	5	3012.98	0
6494	SIPA1	5	2931.91	0
10277	UBE4B	5	2867.49	0
57142	RTN4	5	2849.06	0
8895	CPNE3	5	2775.13	0
5976	UPF1	5	2761.64	0
841	CASP8	5	2746.94	0
29028	ATAD2	5	2665.06	0
875	CBS	5	2649.73	0
54941	RNF125	5	2639.95	0
60491	NIF3L1	5	2597.7	0
6741	SSB	5	2585.1	0
84447	SYVN1	5	2582.28	0
84080	C16orf48	5	2557.36	0
79807	GSTCD	5	2533.1	0
91445	RNF185	5	2524.65	0
4168	MCF2	5	2504.62	0
3146	HMGB1	5	2494.35	0
3757	KCNH2	5	2481.07	0
25827	FBXL2	5	2457.2	0
6462	SHBG	5	2449.08	0
10342	TFG	5	2442.38	0
54758	KLHDC4	5	2441.65	0
25977	NECAP1	5	2354.3	0
80258	EFHC2	5	2352.43	0
56288	PARD3	5	2327.05	0
4772	NFATC1	5	2312.06	0
864	RUNX3	5	2310.87	0
1936	EEF1D	5	2284.2	0
7345	UCHL1	5	2280.48	0
1953	MEGF6	5	2233.12	0
57606	SLAIN2	5	2232.74	0
10565	ARFGEF1	5	2192.35	0
6280	S100A9	5	2188.79	0
5430	POLR2A	5	2168.87	0
3702	ITK	5	2153.01	0
23567	ZNF346	5	2121.02	0
23641	LDOC1	5	2108.19	0
1108	CHD4	5	2089.63	0
27330	RPS6KA6	5	2086.97	0
548596	CKMT1A	5	2060.86	0
1159	CKMT1B	5	2060.86	0
5610	EIF2AK2	5	1993.82	0
51222	ZNF219	5	1949.14	0
7167	TPI1	5	1937.28	0
4673	NAP1L1	5	1893.68	0
26787	SNORD61	5	1891.92	0
27316	RBMX	5	1891.92	0
5901	RAN	5	1860.28	0
51429	SNX9	5	1851.46	0
56159	TEX11	5	1849.74	0
871	SERPINH1	5	1845.98	0
5584	PRKCI	5	1807.62	0
3728	JUP	5	1772.17	0
55027	HEATR3	5	1763.74	0
100129518	LOC100129518	5	1729	0
6648	SOD2	5	1729	0
3068	HDGF	5	1708.7	0
19	ABCA1	5	1692.98	0
285093	CXXC11	5	1681.43	0
3276	PRMT1	5	1670.58	0
81027	TUBB1	5	1629.76	0
25959	KANK2	5	1618.36	0
25942	SIN3A	5	1584.95	0
1981	EIF4G1	5	1582.02	0
8358	HIST1H3B	5	1564.1	0
8357	HIST1H3H	5	1564.1	0
8968	HIST1H3F	5	1564.1	0
8352	HIST1H3C	5	1564.1	0
8356	HIST1H3J	5	1564.1	0
8353	HIST1H3E	5	1564.1	0
8350	HIST1H3A	5	1564.1	0
8351	HIST1H3D	5	1564.1	0
8355	HIST1H3G	5	1564.1	0
8354	HIST1H3I	5	1564.1	0
602	BCL3	5	1561.21	0
4621	MYH3	5	1539.64	0
9638	FEZ1	5	1504.46	0
1938	EEF2	5	1455.09	0
9611	NCOR1	5	1451.31	0
59	ACTA2	5	1449.07	0
6632	SNRPD1	5	1441.71	0
6152	RPL24	5	1439.48	0
4113	MAGEB2	5	1409.39	0
9156	EXO1	5	1408.5	0
6901	TAZ	5	1355.9	0
7852	CXCR4	5	1352.35	0
79705	LRRK1	5	1348.42	0
2876	GPX1	5	1341.02	0
10988	METAP2	5	1309.32	0
9616	RNF7	5	1277.85	0
10294	DNAJA2	5	1259.55	0
84966	IGSF21	5	1227.97	0
64221	ROBO3	5	1197.77	0
4602	MYB	5	1176.55	0
10469	TIMM44	5	1167.54	0
3020	H3F3A	5	1161.83	0
3021	H3F3B	5	1161.83	0
26057	ANKRD17	5	1145.33	0
79745	CLIP4	5	1138.63	0
163033	ZNF579	5	1116.17	0
4900	NRGN	5	1106.9	0
64223	MLST8	5	1087.38	0
91833	WDR20	5	1079.92	0
26015	RPAP1	5	1078.08	0
4867	NPHP1	5	1075.09	0
60488	MRPS35	5	1074.92	0
80020	FOXRED2	5	1027.17	0
9479	MAPK8IP1	5	1014.64	0
644172	LOC644172	5	1014.64	0
6134	RPL10	5	1012.79	0
26778	SNORA70	5	1012.79	0
26790	SNORD58B	5	994.18	0
26791	SNORD58A	5	994.18	0
100124516	SNORD58C	5	994.18	0
6139	RPL17	5	994.18	0
23492	CBX7	5	972.81	0
3714	JAG2	5	963.67	0
4291	MLF1	5	963.24	0
3857	KRT9	5	959.11	0
10477	UBE2E3	5	955.14	0
26985	AP3M1	5	941.79	0
4839	NOP2	5	912.94	0
8971	H1FX	5	891.92	0
9119	KRT75	5	890.11	0
6337	SCNN1A	5	887.72	0
5531	PPP4C	5	883.88	0
8837	CFLAR	5	877.66	0
5928	RBBP4	5	871.95	0
9150	CTDP1	5	869.57	0
84461	NEURL4	5	867.28	0
9107	MTMR6	5	861.75	0
64837	KLC2	5	837.32	0
25778	DSTYK	5	837.31	0
25885	POLR1A	5	817.44	0
55170	PRMT6	5	804.12	0
5837	PYGM	5	801.26	0
23011	RAB21	5	794.8	0
253260	RICTOR	5	781.15	0
25836	NIPBL	5	713.24	0
92140	MTDH	5	675.56	0
5395	PMS2	5	673.2	0
9647	PPM1F	5	663.44	0
8662	EIF3B	5	633.93	0
3297	HSF1	5	631.69	0
57563	KLHL8	5	621.32	0
78994	PRR14	5	616.6	0
25796	PGLS	5	607.36	0
124801	LSM12	5	604.88	0
2975	GTF3C1	5	601.98	0
23031	MAST3	5	598.52	0
6652	SORD	5	552.14	0
340061	TMEM173	5	536.31	0
6731	SRP72	5	535.41	0
10750	GRAP	5	527.71	0
5580	PRKCD	5	499.21	0
54540	FAM193B	5	445.53	0
9278	ZBTB22	5	444.09	0
79823	CAMKMT	5	442.01	0
53371	NUP54	5	405.11	0
11130	ZWINT	5	376.1	0
1583	CYP11A1	5	362.31	0
4332	MNDA	5	341.2	0
96459	FNIP1	5	332.08	0
389421	LIN28B	5	306.53	0
8665	EIF3F	5	273.47	0
3172	HNF4A	5	264.95	0
6493	SIM2	5	248.22	0
6059	ABCE1	5	244.69	0
26273	FBXO3	5	149.26	0
9702	CEP57	5	140.12	0
654320	SNORA8	5	133.15	0
692072	SNORD5	5	133.15	0
100302240	MIR1304	5	133.15	0
677805	SNORA18	5	133.15	0
692063	SNORA32	5	133.15	0
79101	TAF1D	5	133.15	0
677822	SNORA40	5	133.15	0
677792	SNORA1	5	133.15	0
151194	METTL21A	5	94.38	0
84246	MED10	5	93.55	0
10844	TUBGCP2	5	84.69	0
51320	MEX3C	5	64.66	0
5440	POLR2K	5	46.76	0
4157	MC1R	4	34657	0
8833	GMPS	4	24277.7	0
6713	SQLE	4	20799	0
9734	HDAC9	4	16398.1	0
1633	DCK	4	15276.8	0
54477	PLEKHA5	4	14167.9	0
219348	PLAC9	4	13982.6	0
83547	RILP	4	13958.1	0
863	CBFA2T3	4	13897	0
11065	UBE2C	4	13896.1	0
116983	ACAP3	4	13882.4	0
2042	EPHA3	4	13486.8	0
5213	PFKM	4	12784.8	0
7423	VEGFB	4	11499.1	0
7422	VEGFA	4	10541.5	0
8462	KLF11	4	9632.39	0
23431	AP4E1	4	9426.52	0
8473	OGT	4	8763.2	0
7009	TMBIM6	4	8717.79	0
80318	GKAP1	4	8608.26	0
51109	RDH11	4	8373.43	0
10361	NPM2	4	8343.71	0
8216	LZTR1	4	8327.87	0
26145	IRF2BP1	4	8284.74	0
4698	NDUFA5	4	7905.16	0
22897	CEP164	4	7830.36	0
9368	SLC9A3R1	4	7802.66	0
9874	TLK1	4	7629.7	0
329	BIRC2	4	7628.03	0
5739	PTGIR	4	7458.5	0
2739	GLO1	4	7408.78	0
9931	HELZ	4	7333.2	0
26146	TRAF3IP1	4	7305.19	0
10733	PLK4	4	7285.52	0
79180	EFHD2	4	7285.31	0
9997	SCO2	4	7235.33	0
25851	TECPR1	4	7207.57	0
4034	LRCH4	4	7198.13	0
199745	THAP8	4	7189.7	0
51042	ZNF593	4	7177.95	0
81544	GDPD5	4	7170.92	0
81618	ITM2C	4	7148.03	0
379	ARL4D	4	7105.62	0
1875	E2F5	4	7081.67	0
4795	NFKBIL1	4	7068.14	0
55240	STEAP3	4	7062.07	0
83590	TMUB1	4	7055.09	0
2967	GTF2H3	4	7003.13	0
81576	CCDC130	4	6995.44	0
55666	NPLOC4	4	6959.94	0
10467	ZNHIT1	4	6615.94	0
3927	LASP1	4	6569.45	0
2355	FOSL2	4	6387.88	0
7138	TNNT1	4	6382.22	0
658	BMPR1B	4	5775.73	0
26088	GGA1	4	5556.13	0
6601	SMARCC2	4	5552.63	0
9126	SMC3	4	5511.28	0
90353	CTU1	4	5366.11	0
9231	DLG5	4	5305.92	0
5930	RBBP6	4	5220.12	0
7538	ZFP36	4	5108.2	0
3658	IREB2	4	5105.46	0
84456	L3MBTL3	4	5064.81	0
3840	KPNA4	4	5016.99	0
9610	RIN1	4	4895.39	0
23345	SYNE1	4	4884.06	0
7170	TPM3	4	4744.59	0
55337	C19orf66	4	4730.36	0
8687	KRT38	4	4615.71	0
3983	ABLIM1	4	4430.29	0
3996	LLGL1	4	4399.55	0
6602	SMARCD1	4	4359.85	0
51562	MBIP	4	4344.98	0
401317	LOC401317	4	4333.65	0
9586	CREB5	4	4333.65	0
27156	RTDR1	4	4331.14	0
10146	G3BP1	4	4261.59	0
23005	MAPKBP1	4	4246.12	0
9688	NUP93	4	4118.2	0
4313	MMP2	4	4085.2	0
170954	PPP1R18	4	4067.08	0
10101	NUBP2	4	4017.73	0
5870	RAB6A	4	4004.93	0
23020	SNRNP200	4	3960.79	0
59349	KLHL12	4	3926.99	0
10456	HAX1	4	3925.82	0
815	CAMK2A	4	3905.95	0
47	ACLY	4	3898.85	0
358	AQP1	4	3872.94	0
9218	VAPA	4	3849.59	0
7248	TSC1	4	3838.37	0
50488	MINK1	4	3826.92	0
23532	PRAME	4	3767.43	0
5998	RGS3	4	3761.92	0
396	ARHGDIA	4	3758.4	0
6721	SREBF2	4	3743.84	0
6748	SSR4	4	3719.66	0
6278	S100A7	4	3713.09	0
55885	LMO3	4	3707.84	0
90933	TRIM41	4	3618.66	0
4204	MECP2	4	3613.5	0
30849	PIK3R4	4	3599.33	0
22868	FASTKD2	4	3552.75	0
6164	RPL34	4	3522.48	0
10133	OPTN	4	3480.74	0
8812	CCNK	4	3456.32	0
2176	FANCC	4	3432.53	0
29109	FHOD1	4	3379.67	0
23122	CLASP2	4	3355.61	0
6737	TRIM21	4	3315.52	0
[truncated: 4,937 more rows]
